# Supplementary material for: Liang-Ge-San, a Classic Traditional Chinese Medicine Formula, Attenuates Lipopolysaccharide-Induced Acute Lung Injury Through Up-Regulating miR-21
Source: PubMed Central journal article supplement (PMC6868520; doi:10.3389/fphar.2019.01332), 2019-11-14
Supplement: DataSheet_1.pdf [file DataSheet_1.pdf]

# 1 Supplementary Figures

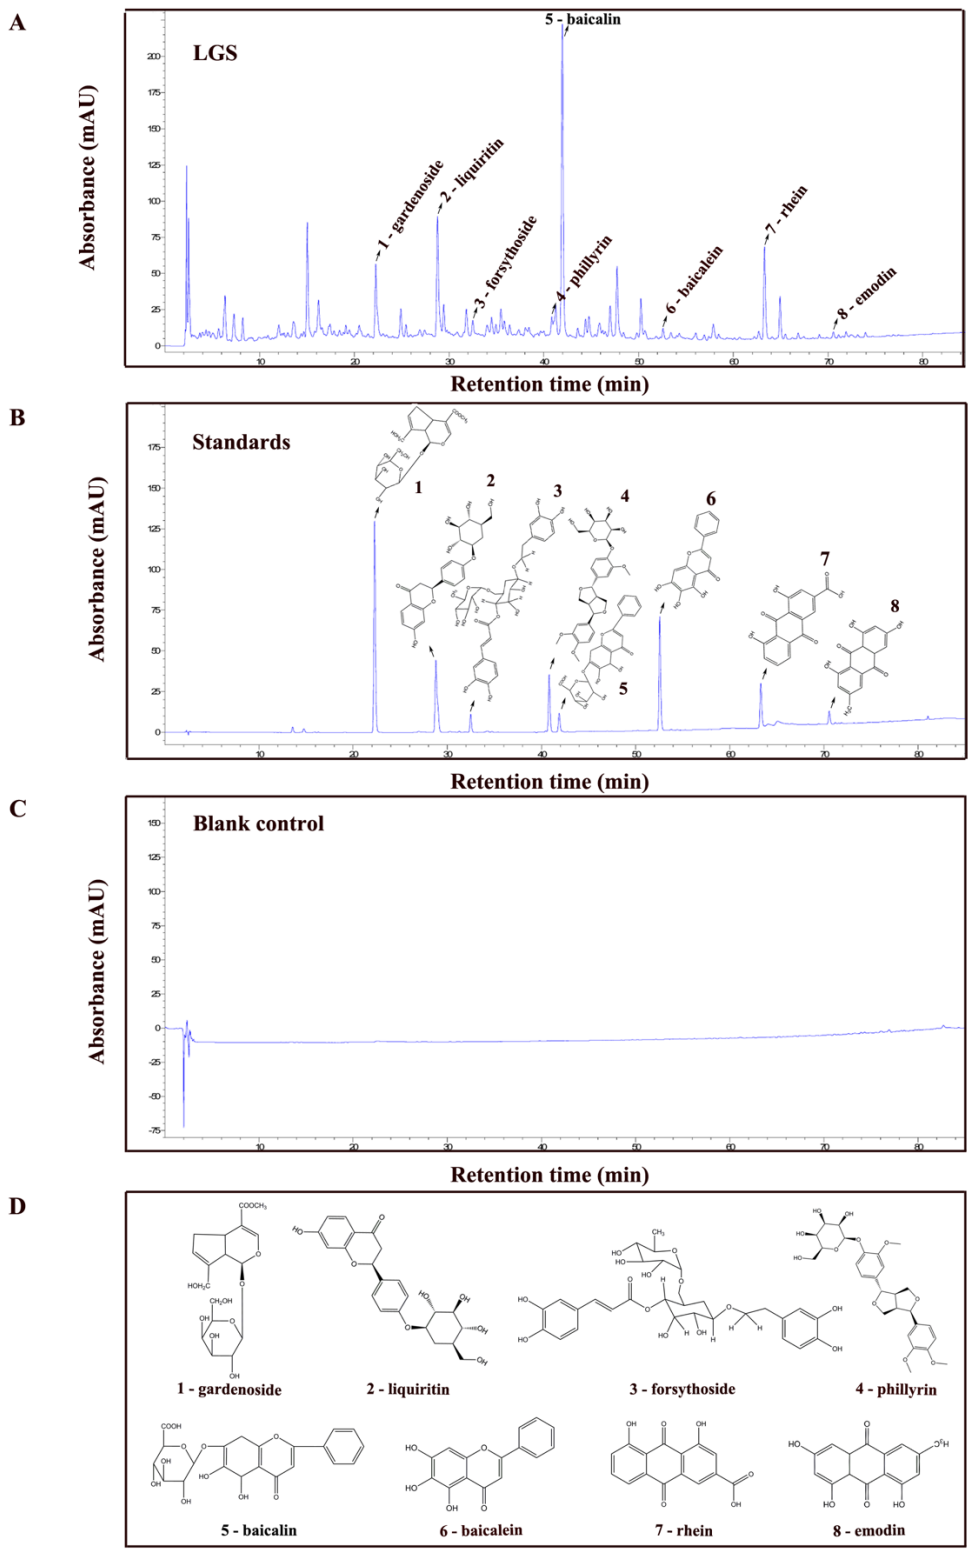

2  
3  
4  
5  
6  
7

**Figure S1.** HPLC-DAD analysis of LGS (A) and mixed reference substances (B) as well as blank control (C) ( $\lambda=235$  nm). 1 - gardenoside; 2 - liquiritin; 3 – forsythoside; 4 - phillyrin; 5 - baicalin; 6 - baicalein; 7 - rhein; 8 - emodin.

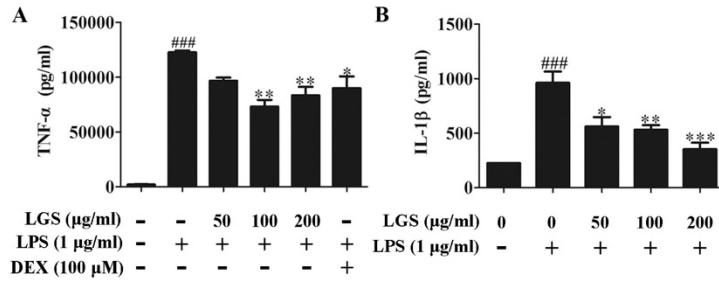

1  
2  
3  
4  
5  
6  
7  
8  
9

**Figure S2. LGS suppresses the release of TNF- $\alpha$  and IL-1 $\beta$  in LPS-stimulated RAW 264.7 cells.** (A - B) LGS inhibits the release of TNF- $\alpha$  and IL-1 $\beta$ . Macrophages were co-incubated with various concentrations of LGS (50, 100, 200  $\mu$ g/ml) and LPS (1  $\mu$ g/ml) for 24 h. The level of TNF- $\alpha$  and IL-1 $\beta$  in supernatants was analyzed by ELISA. Data are represented as the mean  $\pm$  SEM of three independent experiments.  $###P < 0.001$  versus control,  $*P < 0.05$ ,  $**P < 0.01$  and  $***P < 0.001$  versus LPS treatment by one-way ANOVA with Tukey's test.

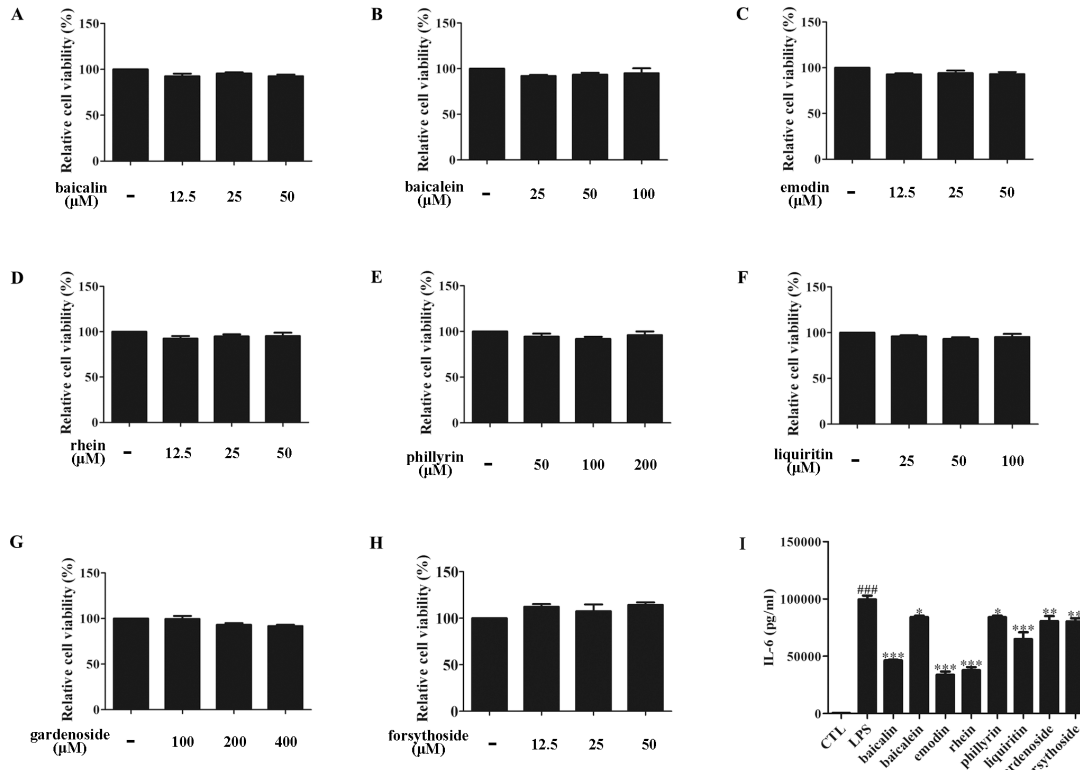

10  
11  
12  
13  
14  
15  
16  
17  
18  
19

**Figure S3. The anti-inflammatory activity of eight compounds in LGS.** (A-G) various compounds in LGS (baicalin, baicalein, emodin, rhein, phillyrin, liquiritin and gardenoside, forsythoside, 40 $\mu$ M, respectively) has no obvious cytotoxicity in RAW264.7 macrophage cells. The cell cytotoxicity of LGS was confirmed by MTT assay. (H) Macrophages were co-incubated with LPS (1  $\mu$ g/ml) and various compounds in LGS (baicalin, baicalein, emodin, rhein, phillyrin, liquiritin and gardenoside, forsythoside, 40 $\mu$ M, respectively) for 24 h. The level of IL-6 in supernatants was analyzed by ELISA. Data are represented as the mean  $\pm$  SEM of three independent experiments.  $###P < 0.001$  versus control,  $*P < 0.05$ ,  $**P < 0.01$  and  $***P < 0.001$  versus

1 LPS treatment by one-way ANOVA with Tukey's test.

2

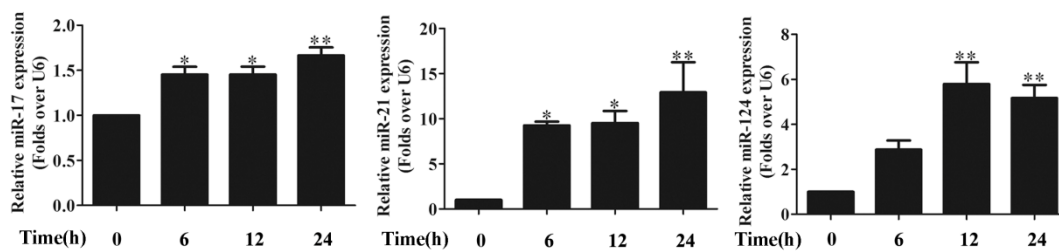

3

4 **Figure S4. LGS increases the expression of miR-17, miR-21 and miR-124 in**  
 5 **RAW264.7 cells.** RAW 264.7 cells were incubated with LGS (200 µg/ml) for 6, 12 or  
 6 24 h, respectively. The expressions of miR-17, miR-21 and miR-124 were examined by  
 7 qPCR. Data are represented as the mean ± SEM of three independent experiments. \**P*  
 8 < 0.05 and \*\**P* < 0.001 versus control by one-way ANOVA with Tukey's test.

9

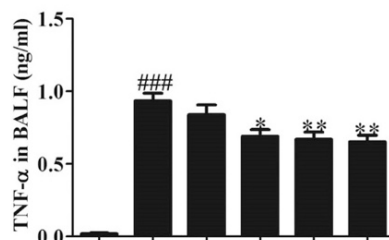

|                |   |   |   |    |    |   |
|----------------|---|---|---|----|----|---|
| LGS (mg/kg)    | - | - | 5 | 10 | 15 | - |
| LPS (3 mg/kg)  | - | + | + | +  | +  | + |
| DEX (10 mg/kg) | - | - | - | -  | -  | + |

10

11 **Figure S5. LGS decreases the level of TNF-α in BALF in ALI mice.** The level of  
 12 TNF-α was detected by ELISA. Data are represented as the mean ± SEM. ###*P* < 0.001  
 13 versus control, \**P* < 0.05, \*\**P* < 0.01 versus LPS treatment by one-way ANOVA with  
 14 Tukey's test.

15

16

**Table 1. Content of Compounds in LGS ( $\bar{x} \pm S$ , n=3)**

| Compounds                | baicalin    | baicalein   | emodin      | rhein      | phillyrin   | liquiritin  | gardenoside  | frosythoside |
|--------------------------|-------------|-------------|-------------|------------|-------------|-------------|--------------|--------------|
| Concentration (µg/10 µL) | 2.518±0.162 | 0.0608±0.05 | 0.0655±0.04 | 0.665±0.07 | 0.279±0.006 | 0.896±0.111 | 0.5068±0.008 | 0.227±0.005  |

17 \*Data were presented as mean ± S.E. The experiments were performed at least three  
 18 times.

# 康美药业股份有限公司

## 中药饮片检验报告

报告书编号: BM201712010010

|          |                                                                                                                                                                                                                                                                                                         |                                                                               |             |
|----------|---------------------------------------------------------------------------------------------------------------------------------------------------------------------------------------------------------------------------------------------------------------------------------------------------------|-------------------------------------------------------------------------------|-------------|
| 检品名称     | 大黄                                                                                                                                                                                                                                                                                                      | 产地                                                                            | 四川          |
| 检品来源     | 车间                                                                                                                                                                                                                                                                                                      | 包装规格                                                                          | 统装          |
| 数量       | /                                                                                                                                                                                                                                                                                                       | 批号                                                                            | 171103591   |
| 取样量      | 200g                                                                                                                                                                                                                                                                                                    | 请检人                                                                           | 丁望星         |
| 检验目的     | 入库检验                                                                                                                                                                                                                                                                                                    | 生产日期                                                                          | /           |
| 请检日期     | 2017年11月23日                                                                                                                                                                                                                                                                                             | 报告日期                                                                          | 2017年12月01日 |
| 检验依据     | 《中国药典》2015年版一部                                                                                                                                                                                                                                                                                          |                                                                               |             |
| 检验项目     | 标准规定                                                                                                                                                                                                                                                                                                    | 检验结果                                                                          | 结论          |
| 【性状】     | 应具有大黄的性状特征                                                                                                                                                                                                                                                                                              | 具有大黄的性状特征                                                                     | 符合规定        |
| 【鉴别】     | 应具有大黄的显微特征                                                                                                                                                                                                                                                                                              | 具有大黄的显微特征                                                                     | 符合规定        |
| 显微鉴别*    | 应呈正反应                                                                                                                                                                                                                                                                                                   | 呈正反应                                                                          | 符合规定        |
| 理化鉴别*    | 供试品色谱中,在与对照药材色谱相应的位置上,应显相同的五个橙黄色荧光主斑点;在与对照品色谱相应的位置上,应显相同的橙黄色荧光斑点,置氨蒸气中熏后,斑点应变为红色                                                                                                                                                                                                                        | 供试品色谱中,在与对照药材色谱相应的位置上,显相同的五个橙黄色荧光主斑点;在与对照品色谱相应的位置上,显相同的橙黄色荧光斑点,置氨蒸气中熏后,斑点变为红色 | 符合规定        |
| 薄层鉴别*    |                                                                                                                                                                                                                                                                                                         |                                                                               |             |
| 【检查】     | 不得过 3%                                                                                                                                                                                                                                                                                                  | 0.2%                                                                          | 符合规定        |
| 药屑、杂质    | 供试品色谱中,在与对照品色谱相应的位置上,应不得显相同的亮蓝色荧光斑点                                                                                                                                                                                                                                                                     | 供试品色谱中,在与对照品色谱相应的位置上,不得显相同的亮蓝色荧光斑点                                            | 符合规定        |
| 土大黄苷*    |                                                                                                                                                                                                                                                                                                         |                                                                               |             |
| 干燥失重     | 不得过 15.0%                                                                                                                                                                                                                                                                                               | 7.4%                                                                          | 符合规定        |
| 总灰分*     | 不得过 10.0%                                                                                                                                                                                                                                                                                               | 8.1%                                                                          | 符合规定        |
| 二氧化硫残留量* | 不得过 150mg/kg                                                                                                                                                                                                                                                                                            | 0mg/kg                                                                        | 符合规定        |
| 【浸出物】    | 不得少于 25.0%                                                                                                                                                                                                                                                                                              | 38.2%                                                                         | 符合规定        |
| 【含量测定】   |                                                                                                                                                                                                                                                                                                         |                                                                               |             |
| 总蒽醌      | 本品按干燥品计算,含总蒽醌以芦荟大黄素(C <sub>15</sub> H <sub>10</sub> O <sub>5</sub> )、大黄酸(C <sub>15</sub> H <sub>8</sub> O <sub>6</sub> )、大黄素(C <sub>15</sub> H <sub>10</sub> O <sub>5</sub> )、大黄酚(C <sub>15</sub> H <sub>10</sub> O <sub>4</sub> )和大黄素甲醚(C <sub>16</sub> H <sub>12</sub> O <sub>5</sub> )的总量计,不得少于 1.5% | 2.7%                                                                          | 符合规定        |
| 检验结论     | 本品按《中国药典》2015年版一部检验,结果符合规定。                                                                                                                                                                                                                                                                             |                                                                               |             |
| 备注       | 带“*”的检测项目为引用中药材检验数据;检验报告书未加盖检验报告专用章无效                                                                                                                                                                                                                                                                   |                                                                               |             |

检验人: 周臣

复核人: 林颖

质量控制负责人:

17/11

# 康美药业股份有限公司

## 中药饮片检验报告

报告书编号: BM201712010010

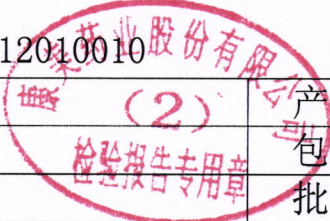

|            |                                                                                                                                                                                                                                                                                                          |      |             |
|------------|----------------------------------------------------------------------------------------------------------------------------------------------------------------------------------------------------------------------------------------------------------------------------------------------------------|------|-------------|
| 检品名称       | 大黄                                                                                                                                                                                                                                                                                                       | 产地   | 四川          |
| 检品来源       | 车间                                                                                                                                                                                                                                                                                                       | 包装规格 | 统装          |
| 数量         | /                                                                                                                                                                                                                                                                                                        | 批号   | 171103591   |
| 取样量        | 200g                                                                                                                                                                                                                                                                                                     | 请检人  | 丁望星         |
| 检验目的       | 入库检验                                                                                                                                                                                                                                                                                                     | 生产日期 | /           |
| 请检日期       | 2017年11月23日                                                                                                                                                                                                                                                                                              | 报告日期 | 2017年12月01日 |
| 检验依据       | 《中国药典》2015年版一部                                                                                                                                                                                                                                                                                           |      |             |
| 检验项目       | 标准规定                                                                                                                                                                                                                                                                                                     | 检验结果 | 结论          |
| 游离蒽醌       | 本品按干燥品计算,含游离蒽醌以芦荟大黄素(C <sub>15</sub> H <sub>10</sub> O <sub>5</sub> )、大黄酸(C <sub>15</sub> H <sub>8</sub> O <sub>6</sub> )、大黄素(C <sub>15</sub> H <sub>10</sub> O <sub>5</sub> )、大黄酚(C <sub>15</sub> H <sub>10</sub> O <sub>4</sub> )和大黄素甲醚(C <sub>16</sub> H <sub>12</sub> O <sub>5</sub> )的总量计,不得少于0.35% | 1.7% | 符合规定        |
| ***以下空白*** |                                                                                                                                                                                                                                                                                                          |      |             |
| 检验结论       | 本品按《中国药典》2015年版一部检验,结果符合规定。                                                                                                                                                                                                                                                                              |      |             |
| 备注         | 带“*”的检测项目为引用中药材检验数据;检验报告书未加盖检验报告专用章无效                                                                                                                                                                                                                                                                    |      |             |

检验人: 周廷

复核人: 林磊

质量控制负责人:

丁望星  
5/11

# 康美药业股份有限公司

## 中药饮片检验报告

报告书编号: BM201711160069

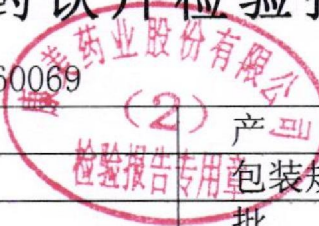

|            |                                                                             |                                      |             |
|------------|-----------------------------------------------------------------------------|--------------------------------------|-------------|
| 检品名称       | 连翘(青翘)                                                                      | 产地                                   | 山西          |
| 检品来源       | 车间                                                                          | 包装规格                                 | 统装          |
| 数量         | /                                                                           | 批号                                   | 171102131   |
| 取样量        | 200g                                                                        | 请检人                                  | 丁望星         |
| 检验目的       | 入库检验                                                                        | 生产日期                                 | /           |
| 请检日期       | 2017年11月16日                                                                 | 报告日期                                 | 2017年11月16日 |
| 检验依据       | 《中国药典》2015年版一部                                                              |                                      |             |
| 检验项目       | 标准规定                                                                        | 检验结果                                 | 结论          |
| 【性状】*      | 应具有连翘的性状特征                                                                  | 具有连翘的性状特征                            | 符合规定        |
| 【鉴别】       |                                                                             |                                      |             |
| 显微鉴别*      | 应具有连翘的显微特征                                                                  | 具有连翘的显微特征                            | 符合规定        |
| 薄层鉴别*      | 供试品色谱中,在与对照药材色谱和对照品色谱相应的位置上,应显相同颜色的斑点                                       | 供试品色谱中,在与对照药材色谱和对照品色谱相应的位置上,显相同颜色的斑点 | 符合规定        |
| 【检查】       |                                                                             |                                      |             |
| 药屑、杂质      | 不得过 3%                                                                      | 0.2%                                 | 符合规定        |
| 水分         | 不得过 10.0%                                                                   | 8.3%                                 | 符合规定        |
| 总灰分*       | 不得过 4.0%                                                                    | 3.0%                                 | 符合规定        |
| 二氧化硫残留量*   | 不得过 150mg/kg                                                                | 0mg/kg                               | 符合规定        |
| 【浸出物】*     | 不得少于 30.0%                                                                  | 41.2%                                | 符合规定        |
| 【含量测定】*    | 本品按干燥品计算,含连翘苷(C <sub>27</sub> H <sub>34</sub> O <sub>17</sub> )不得少于 0.15%   | 0.70%                                | 符合规定        |
|            | 本品按干燥品计算,含连翘酯苷A(C <sub>29</sub> H <sub>36</sub> O <sub>15</sub> )不得少于 0.25% | 16%                                  | 符合规定        |
| ***以下空白*** |                                                                             |                                      |             |
| 检验结论       | 本品按《中国药典》2015年版一部检验,结果符合规定。                                                 |                                      |             |
| 备注         | 带“*”的检测项目为引用中药材检验数据;检验报告书未加盖检验报告专用章无效                                       |                                      |             |

检验人: 吴妹泥

复核人: 林颖

质量控制负责人:

17  
6/11

# 康美药业股份有限公司

## 中药饮片检验报告

报告书编号: BM201802230014

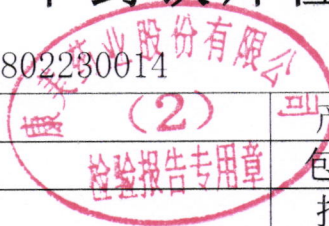

|            |                                                                            |                                                         |             |
|------------|----------------------------------------------------------------------------|---------------------------------------------------------|-------------|
| 检品名称       | 黄芩片 (2)                                                                    | 产地                                                      | 河北          |
| 检品来源       | 车间                                                                         | 包装规格                                                    | 统装          |
| 数量         | /                                                                          | 批号                                                      | 180106211   |
| 取样量        | 200g                                                                       | 请检人                                                     | 黄勇泉         |
| 检验目的       | 入库检验                                                                       | 生产日期                                                    | /           |
| 请检日期       | 2018年02月01日                                                                | 报告日期                                                    | 2018年02月23日 |
| 检验依据       | 《中国药典》2015年版一部及《国家食品药品监督管理局药品检验补充检验方法和检验项目批准件》2010004号                     |                                                         |             |
| 检验项目       | 标准规定                                                                       | 检验结果                                                    | 结论          |
| 【性状】       | 应具有黄芩片的性状特征                                                                | 具有黄芩片的性状特征                                              | 符合规定        |
| 【鉴别】       |                                                                            |                                                         |             |
| 显微鉴别*      | 应具有黄芩的显微特征                                                                 | 具有黄芩的显微特征                                               | 符合规定        |
| 薄层鉴别*      | 供试品色谱中,在与对照药材色谱相应的位置上,应显相同颜色的斑点;在与对照品色谱相应的位置上,应显三个相同的暗色斑点                  | 供试品色谱中,在与对照药材色谱相应的位置上,显相同颜色的斑点;在与对照品色谱相应的位置上,显三个相同的暗色斑点 | 符合规定        |
| 【检查】       |                                                                            |                                                         |             |
| 药屑、杂质      | 不得过 3%                                                                     | 0.2%                                                    | 符合规定        |
| 水分         | 不得过 13%                                                                    | 6%                                                      | 符合规定        |
| 二氧化硫残留量*   | 不得过 150mg/kg                                                               | 0mg/kg                                                  | 符合规定        |
| 金胺 O*      | 不得检出                                                                       | 未检出                                                     | 符合规定        |
| 【含量测定】     | 本品按干燥品计算,含黄芩苷 (C <sub>21</sub> H <sub>18</sub> O <sub>11</sub> ) 不得少于 8.0% | 21%                                                     | 符合规定        |
| ***以下空白*** |                                                                            |                                                         |             |
| 检验结论       | 本品按《中国药典》2015年版一部及《国家食品药品监督管理局药品检验补充检验方法和检验项目批准件》2010004号检验,结果符合规定。        |                                                         |             |
| 备注         | 带“*”的检测项目为引用中药材检验数据;检验报告书未加盖检验报告专用章无效                                      |                                                         |             |

检验人: 周连

复核人: 林毅

质量控制负责人:

17) 7/11

# 康美药业股份有限公司

## 中药饮片检验报告

报告书编号: BM201712260033(2)

|            |                                                                          |                                                            |             |
|------------|--------------------------------------------------------------------------|------------------------------------------------------------|-------------|
| 检品名称       | 甘草片                                                                      | 产地                                                         | 内蒙古         |
| 检品来源       | 车间                                                                       | 包装规格                                                       | 统装          |
| 数量         | /                                                                        | 批号                                                         | 171201291   |
| 取样量        | 200g                                                                     | 请检人                                                        | 张炜全         |
| 检验目的       | 入库检验                                                                     | 生产日期                                                       | /           |
| 请检日期       | 2017年12月12日                                                              | 报告日期                                                       | 2017年12月26日 |
| 检验依据       | 《中国药典》2015年版一部                                                           |                                                            |             |
| 检验项目       | 标准规定                                                                     | 检验结果                                                       | 结论          |
| 【性状】       | 应具有甘草片的性状特征                                                              | 具有甘草片的性状特征                                                 | 符合规定        |
| 【鉴别】       |                                                                          |                                                            |             |
| 显微鉴别*      | 应具有甘草的显微特征                                                               | 具有甘草的显微特征                                                  | 符合规定        |
| 薄层鉴别*      | 供试品色谱中,在与对照药材色谱相应的位置上,应显相同颜色的荧光斑点;在与对照品色谱相应的位置上,应显相同的橙黄色荧光斑点             | 供试品色谱中,在与对照药材色谱相应的位置上,显相同颜色的荧光斑点;在与对照品色谱相应的位置上,显相同的橙黄色荧光斑点 | 符合规定        |
| 【检查】       |                                                                          |                                                            |             |
| 药屑、杂质      | 不得过 3%                                                                   | 0.2%                                                       | 符合规定        |
| 水分         | 不得过 12.0%                                                                | 9.6%                                                       | 符合规定        |
| 总灰分*       | 不得过 5.0%                                                                 | 3.7%                                                       | 符合规定        |
| 重金属及有害元素*  | 铅不得过 5mg/kg                                                              | 0.1mg/kg                                                   | 符合规定        |
|            | 镉不得过 0.3mg/kg                                                            | 0.02mg/kg                                                  | 符合规定        |
|            | 砷不得过 2mg/kg                                                              | 0.1mg/kg                                                   | 符合规定        |
|            | 汞不得过 0.2mg/kg                                                            | 未检出                                                        | 符合规定        |
|            | 铜不得过 20mg/kg                                                             | 6.0mg/kg                                                   | 符合规定        |
| 二氧化硫残留量*   | 不得过 150mg/kg                                                             | 0mg/kg                                                     | 符合规定        |
| 【含量测定】     |                                                                          |                                                            |             |
|            | 本品按干燥品计算,含甘草苷(C <sub>21</sub> H <sub>22</sub> O <sub>9</sub> )不得少于 0.45% | 0.72%                                                      | 符合规定        |
|            | 本品按干燥品计算,含甘草酸(C <sub>42</sub> H <sub>62</sub> O <sub>16</sub> )不得少于 1.8% | 2.2%                                                       | 符合规定        |
| ***以下空白*** |                                                                          |                                                            |             |
| 检验结论       | 本品按《中国药典》2015年版一部检验,结果符合规定。                                              |                                                            |             |
| 备注         | 带“*”的检测项目为引用中药材检验数据;检验报告书未加盖检验报告专用章无效                                    |                                                            |             |

检验人: 张炜全

复核人: 林颖

质量控制负责人:

17.11 / 11



# 康美药业股份有限公司

## 中药饮片检验报告

报告书编号: BM201712100015

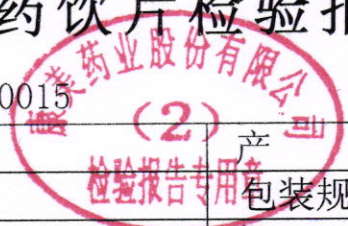

|            |                                                                             |                                        |             |
|------------|-----------------------------------------------------------------------------|----------------------------------------|-------------|
| 检品名称       | 栀子                                                                          | 产地                                     | 江西          |
| 检品来源       | 车间                                                                          | 包装规格                                   | 统装          |
| 数量         | /                                                                           | 批号                                     | 171107691   |
| 取样量        | 200g                                                                        | 请检人                                    | 张炜全         |
| 检验目的       | 入库检验                                                                        | 生产日期                                   | /           |
| 请检日期       | 2017年12月10日                                                                 | 报告日期                                   | 2017年12月10日 |
| 检验依据       | 《中国药典》2015年版一部                                                              |                                        |             |
| 检验项目       | 标准规定                                                                        | 检验结果                                   | 结论          |
| 【性状】       | 应具有栀子的性状特征                                                                  | 具有栀子的性状特征                              | 符合规定        |
| 【鉴别】       |                                                                             |                                        |             |
| 显微鉴别*      | 应具有栀子的显微特征                                                                  | 具有栀子的显微特征                              | 符合规定        |
| 薄层鉴别*      | 供试品色谱中, 在于对照药材色谱和对照品色谱相应的位置上, 应显相同颜色的斑点                                     | 供试品色谱中, 在于对照药材色谱和对照品色谱相应的位置上, 显相同颜色的斑点 | 符合规定        |
| 【检查】       |                                                                             |                                        |             |
| 药屑、杂质      | 不得过 3%                                                                      | 0.3%                                   | 符合规定        |
| 水分         | 不得过 8.5%                                                                    | 6.2%                                   | 符合规定        |
| 总灰分*       | 不得过 6.0%                                                                    | 4.1%                                   | 符合规定        |
| 二氧化硫残留量*   | 不得过 150mg/kg                                                                | 0mg/kg                                 | 符合规定        |
| 【含量测定】*    | 本品按干燥品计算, 含栀子苷 (C <sub>17</sub> H <sub>24</sub> O <sub>10</sub> ) 不得少于 1.8% | 6.3%                                   | 符合规定        |
| ***以下空白*** |                                                                             |                                        |             |
| 检验结论       | 本品按《中国药典》2015年版一部检验, 结果符合规定。                                                |                                        |             |
| 备注         | 带“*”的检测项目为引用中药材检验数据; 检验报告书未加盖检验报告专用章无效                                      |                                        |             |

检验人: 石小玉

复核人: 林颖

质量控制负责人: 17/11

# 康美药业股份有限公司

## 中药饮片检验报告

报告书编号: BM201712280015

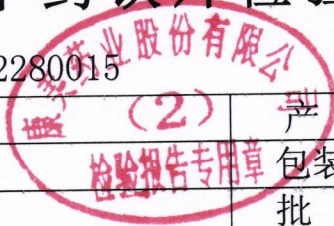

|            |                                                              |              |              |
|------------|--------------------------------------------------------------|--------------|--------------|
| 检品名称       | 芒硝                                                           | 产地           | 四川           |
| 检品来源       | 车间                                                           | 包装规格         | 统装           |
| 数量         | /                                                            | 批号           | 171207391    |
| 取样量        | 200g                                                         | 请检人          | 丁望星          |
| 检验目的       | 入库检验                                                         | 生产日期         | /            |
| 请检日期       | 2017年12月28日                                                  | 报告日期         | 2017年12月28日  |
| 检验依据       | 《中国药典》2015年版一部                                               |              |              |
| 检验项目       | 标准规定                                                         | 检验结果         | 结论           |
| 【性状】*      | 应具有芒硝的性状特征                                                   | 具有芒硝的性状特征    | 符合规定         |
| 【鉴别】       |                                                              |              |              |
| 理化鉴别*      | 应呈正反应<br>应呈正反应                                               | 呈正反应<br>呈正反应 | 符合规定<br>符合规定 |
| 【检查】       |                                                              |              |              |
| 药屑、杂质      | 不得过 3%                                                       | 0.1%         | 符合规定         |
| 干燥失重*      | 应为 51.0%~57.0%                                               | 55.5%        | 符合规定         |
| 铁盐与锌盐*     | 不得发生浑浊或显蓝色                                                   | 符合规定         | 符合规定         |
| 镁盐*        | 不得发生浑浊                                                       | 符合规定         | 符合规定         |
| 重金属*       | 不得过 10mg/kg                                                  | 符合规定         | 符合规定         |
| 砷盐*        | 不得过 10mg/kg                                                  | 符合规定         | 符合规定         |
| 【含量测定】*    | 本品按干燥品计算, 含硫酸钠 (Na <sub>2</sub> SO <sub>4</sub> ) 不得少于 99.0% | 99.2%        | 符合规定         |
| ***以下空白*** |                                                              |              |              |
| 检验结论       | 本品按《中国药典》2015年版一部检验, 结果符合规定。                                 |              |              |
| 备注         | 带“*”的检测项目为引用中药材检验数据; 检验报告书未加盖检验报告专用章无效                       |              |              |

检验人: 柯语晨

复核人: 林颖

质量控制负责人: 17/10/11

# 康美药业股份有限公司

## 中药饮片检验报告

报告书编号: BM201801150008

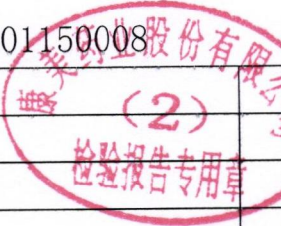

|      |                |      |             |
|------|----------------|------|-------------|
| 检品名称 | 薄荷             | 产地   | 江苏          |
| 检品来源 | 车间             | 包装规格 | 统装          |
| 数量   | /              | 批号   | 171207731   |
| 取样量  | 200g           | 请检人  | 黄勇泉         |
| 检验目的 | 入库检验           | 生产日期 | /           |
| 请检日期 | 2018年01月09日    | 报告日期 | 2018年01月15日 |
| 检验依据 | 《中国药典》2015年版一部 |      |             |

| 检验项目     | 标准规定                                  | 检验结果                                 | 结论   |
|----------|---------------------------------------|--------------------------------------|------|
| 【性状】     | 应具有薄荷的性状特征                            | 具有薄荷的性状特征                            | 符合规定 |
| 【鉴别】     |                                       |                                      |      |
| 显微鉴别*    | 应具有薄荷的显微特征                            | 具有薄荷的显微特征                            | 符合规定 |
| 理化鉴别*    | 应呈正反应                                 | 呈正反应                                 | 符合规定 |
| 薄层鉴别*    | 供试品色谱中,在与对照药材色谱和对照品色谱相应的位置上,应显相同颜色的斑点 | 供试品色谱中,在与对照药材色谱和对照品色谱相应的位置上,显相同颜色的斑点 | 符合规定 |
| 【检查】     |                                       |                                      |      |
| 药屑、杂质    | 不得过 3%                                | 0.3%                                 | 符合规定 |
| 水分       | 不得过 13.0%                             | 8.1%                                 | 符合规定 |
| 总灰分*     | 不得过 11.0%                             | 9.3%                                 | 符合规定 |
| 酸不溶性灰分*  | 不得过 3.0%                              | 2.2%                                 | 符合规定 |
| 二氧化硫残留量* | 不得过 150mg/kg                          | 0mg/kg                               | 符合规定 |
| 【含量测定】   | 本品含挥发油不得少于 0.40% (ml/g)               | 2.2% (ml/g)                          | 符合规定 |

\*\*\*以下空白\*\*\*

|      |                                       |
|------|---------------------------------------|
| 检验结论 | 本品按《中国药典》2015年版一部检验,结果符合规定。           |
| 备注   | 带“*”的检测项目为引用中药材检验数据;检验报告书未加盖检验报告专用章无效 |

检验人:

复核人:

质量控制负责人:
